# Supplementary material for: Reducing exciton binding energy of antimony-based perovskites by improving the phase purity for efficient solar cells
Source: Royal Society of Chemistry journal article supplement (doi:10.1039/d5mh00003c), 2025-01-01
Supplement: d5mh00003c1.pdf [file d5mh00003c1.pdf]

## Supporting Information

### Reducing Exciton Binding Energy of Antimony-based Perovskite via Improving Phase Purity for Efficient Solar Cells

Tengyu Xu,<sup>a</sup> Xian Zhang,<sup>a</sup> Fangzhou Liu,<sup>\*a</sup> Huichao Guo,<sup>a</sup> Jiaqi Zhang,<sup>a</sup> Shaogeng Cai,<sup>a</sup> Deao Li,<sup>a</sup> Yangyang Zhang,<sup>a</sup> Yan Guan,<sup>\*b</sup> Wenjin Yu,<sup>c</sup> Dechun Zou,<sup>b</sup> Lixin Xiao,<sup>\*c</sup> and Cuncun Wu<sup>\*a</sup>

- a. Tianjin Key Laboratory of Materials Laminating Fabrication and Interface Control Technology, School of Materials Science and Engineering, Hebei University of Technology, Tianjin 300401, P. R. China.
- b. College of Chemistry and Molecular Engineering, Peking University, Beijing 100871, P. R. China.
- c. State Key Laboratory for Artificial Microstructure and Mesoscopic Physics, Department of Physics, Peking University, Beijing 100871, P. R. China.

E-mail: liufz@hebut.edu.cn; yanguan@pku.edu.cn; lxxiao@pku.edu.cn;  
cuncunwu@hebut.edu.cn

#### Experimental Section

*Materials:* FTO-coated glass substrates, Spiro-OMeTAD (99.86%), 4-*tert*-butylpyridine (Tbp, 99%), lithium-bis-(trifluoromethanesulfonyl) imide (Li-TFSI, 99%), and acetonitrile (99.9%) were purchased Advanced Election Technology Co. Ltd. Methylammonium chloride (MACl, 99.5%) and cesium iodide (CsI, 99.5%) were purchased from Xi'an Polymer Light Technology Corp., China. Chlorobenzene (CB, 99.99%) and dimethyl sulfoxide (DMSO, 99.7%) were purchased from J&K Scientific. Titanium tetrachloride (TiCl<sub>4</sub>, 99.9%) was purchased from Aladdin Reagent Shanghai Co. Ltd. Antimony (III) iodide (SbI<sub>3</sub>, 99.999%) was purchased from Beijing InnoChem Science & Technology Co. Ltd. All of these commercially available materials were used as received without any further purification.

*Solar Cell Fabrication:* The FTO-coated glass substrates were cleaned ultrasonically in detergent, deionized water, and ethanol. The cleaned FTO-coated glass substrates were then dried with nitrogen. After drying, the substrates were further treated with UV-ozone for 15 min. TiO<sub>2</sub> thin layer was prepared following a chemical bath deposition method.<sup>1</sup> Briefly, the cleaned FTO substrates were immersed in an aqueous TiCl<sub>4</sub> solution (4 ml of TiCl<sub>4</sub> in 200 ml of DI water) and then dried at 70 °C for 1.5 h. The substrates with TiO<sub>2</sub> layer were thoroughly washed with DI water and dried at 150 °C for 60 mins in ambient before use. Perovskite precursor solutions were prepared by dissolving CsI and SbI<sub>3</sub> with a molar ratio of 3:2, 3:2.2, 3:2.3, and 3:2.4, respectively, in 1 ml of DMSO with the addition of 40 mg of MACl. All the precursor

solutions share a Cs<sup>+</sup> concentration of 1.2 M. The perovskite precursor solution was then deposited via spin coating onto the TiO<sub>2</sub> layer at 3000 rpm for 15 s, followed by low pressure-assisted treatment for 60 s and annealing at 150 °C for 10 min. For the hole transport layer, a precursor solution was prepared by dissolving 72.3 mg of spiro-OMeTAD, 28.8 μL of tBP, and 17.5 μL of pre-dissolved Li-TFSI solution (520 mg of Li-TFSI in 1 mL of acetonitrile) in 1 ml of chlorobenzene. The precursor solution was then spin-cast onto the perovskite films at 4000 rpm for 30 s. Finally, 50 nm of gold was thermally evaporated atop the hole transport layer through a shadow mask as the electrode. The Sb-based PSC devices were completed with an n-i-p configuration of FTO/TiO<sub>2</sub>/Cs<sub>3</sub>Sb<sub>2</sub>Cl<sub>x</sub>I<sub>9-x</sub>/spiro-OMeTAD/Au and an active area of 0.1 cm<sup>2</sup>.

*Film and Device Characterizations:* For film characterizations, SEM images of the perovskite films prepared on TiO<sub>2</sub>-coated glass/FTO substrates were obtained using a JEOL JSM-7610F scanning electron microscope. XRD analysis of the perovskite films were performed using a Rigaku SmartLab X-ray diffractometer with Cu K $\alpha$  radiation. UV-vis absorption spectra were collected using a Shimadzu UV-1900 spectrophotometer in the wavelength range from 300 nm to 900 nm. GIWAXS measurements were performed using Xenocs Xeuss 2.0 (GI-)SAXS/WAXS/USAXS beamline system with the wavelength of the incident X-ray beam of 0.154 nm. The GIWAXS patterns were collected by a Pilatus 300 K detector with the sample-to-detector distance of 150 mm, and calibrated by the silver behenate standard sample. Atomic force microscopy (AFM) and conductive atomic force microscopy (C-AFM) studies were performed using Asylum Research MFP 3D Atomic Force Microscope. For C-AFM test, a bias voltage of +1 V was applied between the conductive probe and the sample surface. Temperature dependent PL spectra from 80 K to 300 K were measured using a NanoLog spectrofluorometer in the wavelength range of 490-900 nm with a 450 nm excitation source. Dielectric measurements of the films were performed in the dark with parallel-plate capacitor devices of ITO /perovskite/Au using CHI660E electrochemical workstation.

For device characterizations, dark and light  $J$ - $V$  curves of the devices were measured using a Keithley 2400 sourcemeter. To assess the photovoltaic performance, Sb-based PSC devices were subjected to AM 1.5G simulated solar irradiation (EASISOLAP-50-3A solar simulator, CROWNTECH, INC) at 100 mW cm<sup>-2</sup>. The light intensity of the solar simulator was calibrated using a certified reference cell. The IPCE spectra was recorded using an Enli Technology EQE measurement system (QE-R) and the light intensity at each wavelength was calibrated with a standard single crystal Si photovoltaic cell. Mott-Schottky measurement were performed by CHI660E electrochemical workstation at a frequency of 1 kHz. Electrochemical impedance

spectroscopy (EIS) was measured by applying a bias of the open-circuit voltage with an CHI660E electrochemical workstation under dark conditions. The scanning frequency was set between 1 Hz and  $10^5$  Hz. All device characterizations were performed in ambient without encapsulation.

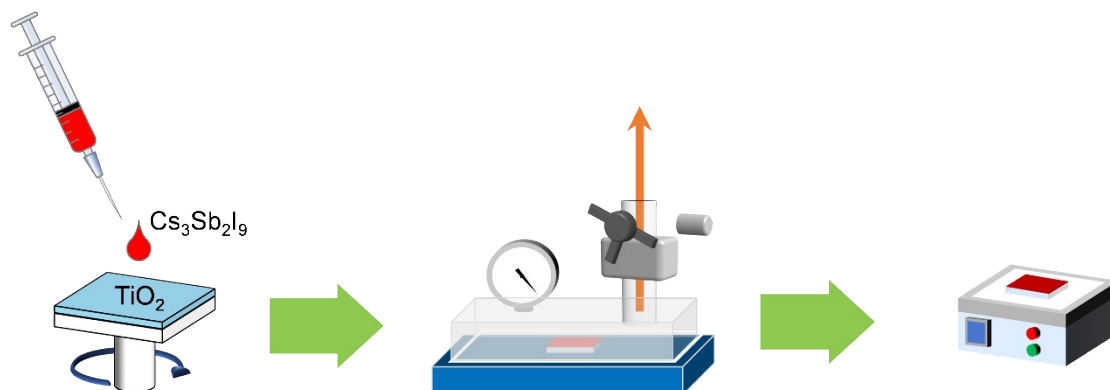

**Figure S1.** Schematic of low pressure assisted (LPA) synthesis of antimony-based perovskite films.

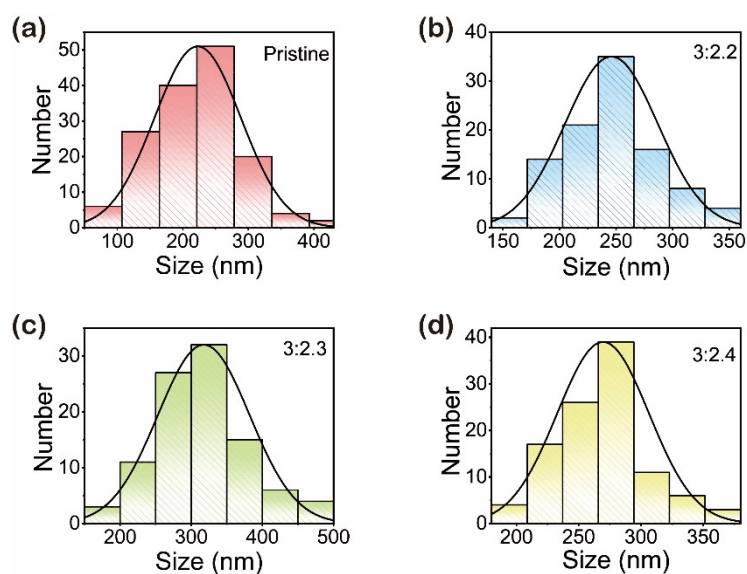

**Figure S2.** Histograms of grain sizes for the  $\text{Cs}_3\text{Sb}_2\text{Cl}_x\text{I}_{9-x}$  films with various precursor  $\text{SbI}_3$  contents.

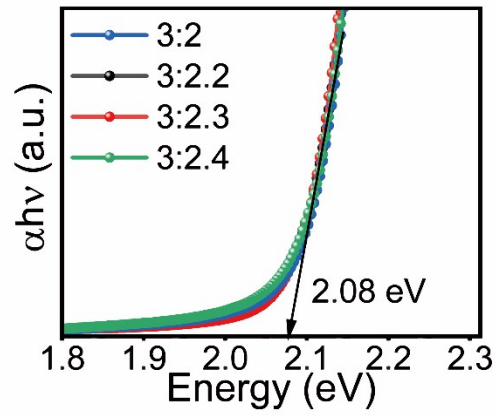

**Figure S3.** Tauc plots of the absorption spectra for the  $\text{Cs}_3\text{Sb}_2\text{Cl}_x\text{I}_{9-x}$  films with various precursor  $\text{SbI}_3$  contents.

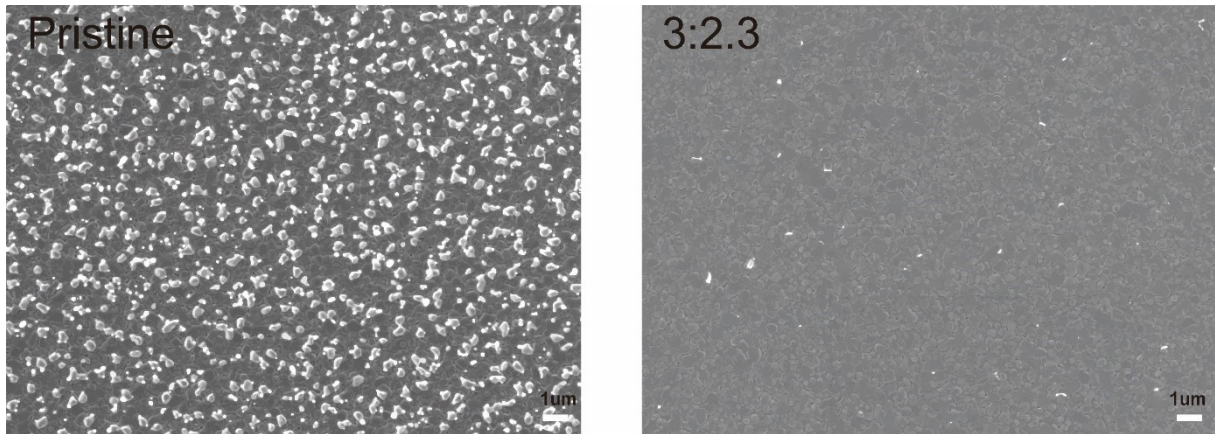

**Figure S4.** Low magnification SEM images of the Pristine film and the 3:2.3 film.

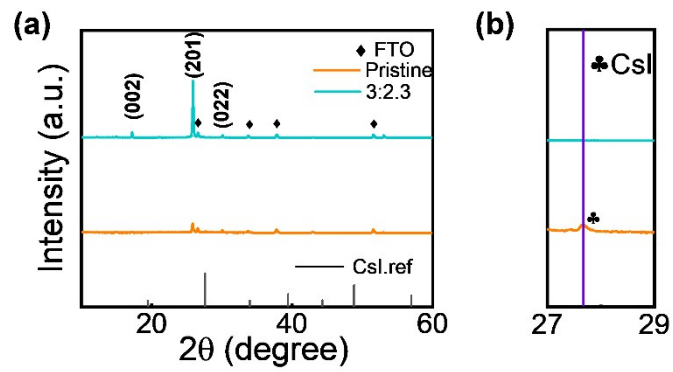

**Figure S5.** a) XRD patterns of the Pristine and 3:2.3 samples, and b) the corresponding zoomed view in the  $2\theta$  range of 27-29°.

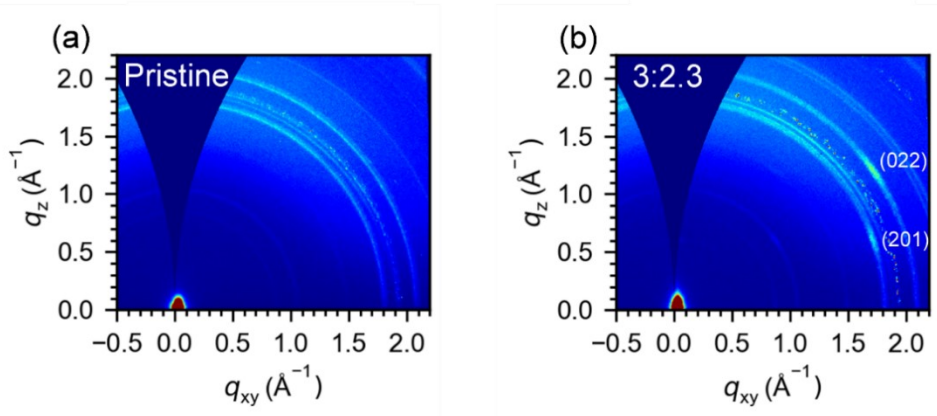

Figure S6. GIWAXS patterns of the Pristine sample and the 3:2.3 sample.

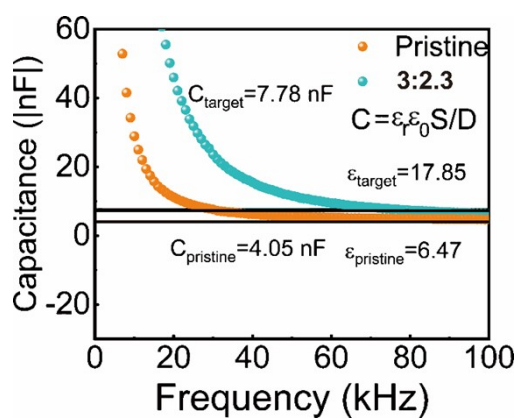

Figure S7. Capacitance as a function of frequency obtained with parallel-plate capacitor devices and the calculated relative dielectric constant for the Pristine and 3:2.3 samples.

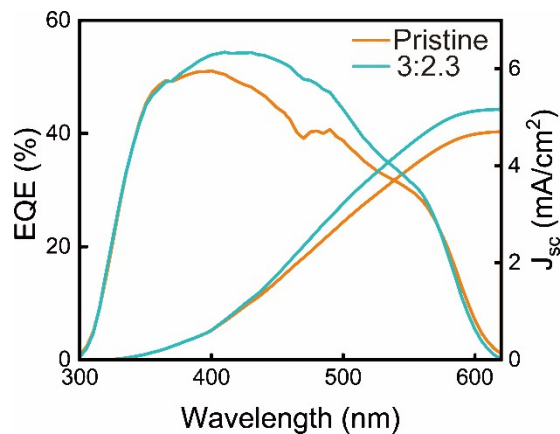

Figure S8. EQE spectra of the Pristine device and the 3:2.3 device.

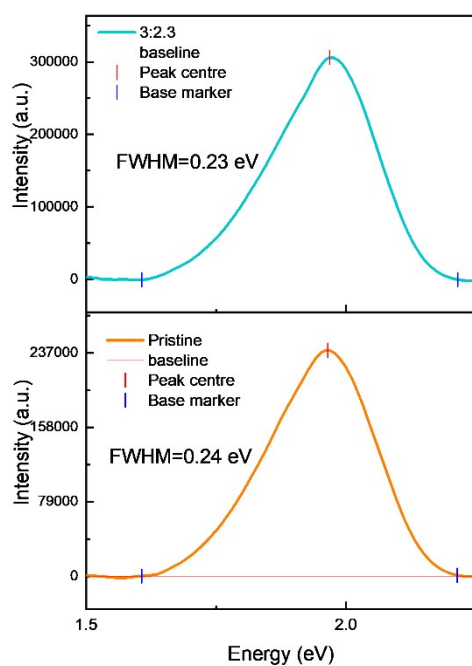

**Figure S9.** PL spectra of the Pristine sample and the 3:2.3 sample at 300 K.

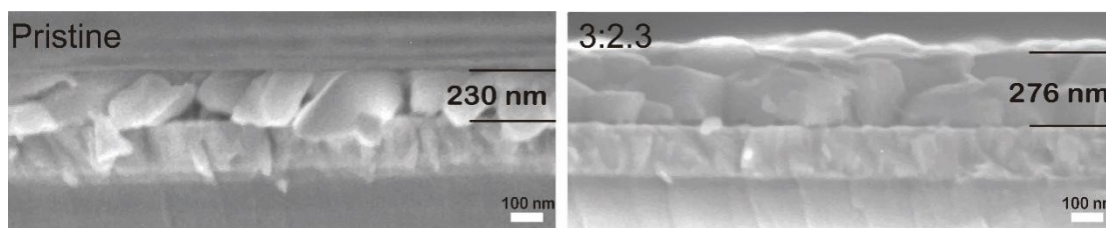

**Figure S10.** Cross-sectional SEM image of the Pristine sample and the 3:2.3 sample.

**Table S1.** The photovoltaic parameters of 15 individual PSC devices for the Pristine devices and the 3:2.3 devices.

| Device Type | Sample No. | $J_{sc}$ (mA/cm <sup>2</sup> ) | $V_{oc}$ (V) | FF (%) | PCE (%) |
|-------------|------------|--------------------------------|--------------|--------|---------|
| Pristine    | 1          | 4.88                           | 0.803        | 65     | 2.55    |
|             | 2          | 4.86                           | 0.819        | 63     | 2.51    |
|             | 3          | 5.14                           | 0.764        | 62     | 2.43    |
|             | 4          | 5.16                           | 0.773        | 62     | 2.47    |
|             | 5          | 5.47                           | 0.778        | 65     | 2.76    |
|             | 6          | 5.23                           | 0.792        | 63     | 2.61    |
|             | 7          | 5.34                           | 0.804        | 64     | 2.74    |
|             | 8          | 5.44                           | 0.786        | 63     | 2.70    |
|             | 9          | 5.52                           | 0.809        | 56     | 2.50    |
|             | 10         | 5.85                           | 0.811        | 64     | 3.04    |

|       |         |       |       |      |      |
|-------|---------|-------|-------|------|------|
|       | 11      | 5.38  | 0.793 | 60   | 2.56 |
|       | 12      | 6.11  | 0.796 | 52   | 2.53 |
|       | 13      | 6.44  | 0.776 | 50   | 2.58 |
|       | 14      | 5.46  | 0.781 | 66   | 2.81 |
|       | 15      | 6.04  | 0.788 | 58   | 2.76 |
|       | average | 5.488 | 0.792 | 60.8 | 2.64 |
| 3:2.3 | 1       | 6.21  | 0.809 | 66   | 3.32 |
|       | 2       | 5.57  | 0.806 | 71   | 3.19 |
|       | 3       | 5.11  | 0.807 | 72   | 2.97 |
|       | 4       | 6.27  | 0.813 | 67   | 3.42 |
|       | 5       | 5.09  | 0.802 | 70   | 2.86 |
|       | 6       | 5.4   | 0.82  | 68   | 3.01 |
|       | 7       | 5.36  | 0.822 | 68   | 2.99 |
|       | 8       | 5.59  | 0.827 | 72   | 3.33 |
|       | 9       | 5.41  | 0.833 | 68   | 3.06 |
|       | 10      | 5.82  | 0.805 | 70   | 3.28 |
|       | 11      | 6.01  | 0.815 | 66   | 3.23 |
|       | 12      | 5.96  | 0.805 | 67   | 3.21 |
|       | 13      | 5.86  | 0.806 | 62   | 2.93 |
|       | 14      | 5.81  | 0.800 | 66   | 3.07 |
|       | 15      | 5.68  | 0.814 | 63   | 2.91 |
|       | average | 5.68  | 0.812 | 67.7 | 3.12 |

**Table S2.** A summary of the PCE for all inorganic Sb-based PSCs with the n-i-p architecture reported in literature and in this work.

| Active Layer                                                           | Structure                                                                                                                           | PCE (%) | Year | Ref. |
|------------------------------------------------------------------------|-------------------------------------------------------------------------------------------------------------------------------------|---------|------|------|
| $\text{Cs}_3\text{Sb}_2\text{I}_9(0\text{D})$                          | FTO/c-TiO <sub>2</sub> /<br>$\text{Cs}_3\text{Sb}_2\text{I}_9(0\text{D})/\text{PTAA}/\text{Au}$                                     | ≈0.06   | 2015 | 2    |
| $\text{Cs}_3\text{Sb}_2\text{I}_9(2\text{D})$                          | FTO/TiO <sub>2</sub> / $\text{Cs}_3\text{Sb}_2\text{I}_9(2\text{D})/\text{Au}$                                                      | 1.21    | 2019 | 3    |
| $\text{Cs}_3\text{Sb}_2\text{Cl}_x\text{I}_{9-x}$                      | FTO/c-TiO <sub>2</sub> /m-TiO <sub>2</sub> / $\text{Cs}_3\text{Sb}_2\text{Cl}_x\text{I}_{9-x}$ /<br>poly-TPD/Au                     | 2.15    | 2020 | 4    |
| $\text{Rb}_{0.15}\text{Cs}_{2.85}\text{Sb}_2\text{Cl}_x\text{I}_{9-x}$ | FTO/Nb <sub>2</sub> O <sub>5</sub> /<br>$\text{Rb}_{0.15}\text{Cs}_{2.85}\text{Sb}_2\text{Cl}_x\text{I}_{9-x}/\text{P3HT}/\text{C}$ | 2.46    | 2021 | 5    |
| $\text{Cs}_3\text{Sb}_2\text{Cl}_x\text{I}_{9-x}$                      | FTO/TiO <sub>2</sub> / $\text{Cs}_3\text{Sb}_2\text{Cl}_x\text{I}_{9-x}$                                                            | 2.5     | 2022 | 6    |

|                                                       |                                                                                                           |      |      |          |
|-------------------------------------------------------|-----------------------------------------------------------------------------------------------------------|------|------|----------|
|                                                       | $x$ /P3HT/Au                                                                                              |      |      |          |
| $\text{Cs}_3\text{Sb}_2\text{Cl}_x\text{I}_{9-x}$     | FTO/c-TiO <sub>2</sub> /Cs <sub>3</sub> Sb <sub>2</sub> Cl <sub>x</sub> I <sub>9-x</sub> /spiro-OMeTAD/Au | 3.2  | 2023 | 7        |
| $\text{Cs}_3\text{Sb}_{2.3}\text{Cl}_x\text{I}_{9-x}$ | FTO/c-TiO <sub>2</sub> /Cs <sub>3</sub> Sb <sub>2</sub> Cl <sub>x</sub> I <sub>9-x</sub> /spiro-OMeTAD/Au | 3.42 | 2024 | Our work |

**Table S3.** The Urbach energy of the  $\text{Cs}_3\text{Sb}_2\text{Cl}_x\text{I}_{9-x}$  with various precursor  $\text{SbI}_3$  contents

| Sample   | slope | Urbach energy (meV) |
|----------|-------|---------------------|
| Pristine | 10.87 | 92                  |
| 3:2.2    | 10.69 | 93                  |
| 3:2.3    | 12.08 | 82                  |
| 3:2.4    | 10.32 | 96                  |

**Table S4.** The FWHM changes of Pristine and 3:2.3 samples at different temperatures

| Temperature | Pristine | 3:2.3   |
|-------------|----------|---------|
| 80 K        | 0.20809  | 0.20345 |
| 90 K        | 0.20638  | 0.20409 |
| 100 K       | 0.20799  | 0.20311 |
| 110 K       | 0.20809  | 0.20261 |
| 120 K       | 0.20809  | 0.20235 |
| 130 K       | 0.21398  | 0.20334 |
| 140 K       | 0.22178  | 0.21156 |
| 150 K       | 0.23793  | 0.22132 |
| 160 K       | 0.25992  | 0.23615 |
| 170 K       | 0.28589  | 0.24116 |
| 180 K       | 0.33379  | 0.25404 |
| 190 K       | 0.34951  | 0.25526 |
| 200 K       | 0.39366  | 0.25028 |

## References

1. X. Zhang, Y. Guan, Y. Zhang, W. Yu, C. Wu, J. Han, Y. Zhang, C. Chen, S. Zheng and L. Xiao, *Adv. Opt. Mater.*, 2022, **10**, 202201598.
2. B. Saparov, F. Hong, J.-P. Sun, H.-S. Duan, W. Meng, S. Cameron, I. G. Hill, Y. Yan and D. B. Mitzi, *Chem. Mater.*, 2015, **27**, 5622-5632.
3. F. Umar, J. Zhang, Z. Jin, I. Muhammad, X. Yang, H. Deng, K. Jahangeer, Q. Hu, H. Song and J. Tang, *Adv. Opt. Mater.*, 2019, **7**, 201801368.
4. Y. Peng, F. Li, Y. Wang, Y. Li, R. L. Z. Hoye, L. Feng, K. Xia and V. Pecunia, *Appl. Mater. Today*, 2020, **19**, 100637.
5. Y. Guo, J. Zhou, F. Zhao, Y. Wu, J. Tao, S. Zuo, J. Jiang, Z. Hu and J. Chu, *Nano Energy*, 2021, **88**, 106281.
6. A. Hiltunen, N. Lamminen, H. Salonen, M. Liu and P. Vivo, *Sustain. Energy Fuels*, 2022, **6**, 217-222.



7. Y. Zhang, F. Liu, H. Su, W. Yu, Y. Zou, C. Wu, X. Zhang, J. Zhang, Y. Liang, J. Han, Y. Guan, Y. Zhang, Z. Ye, R. Li, L. Xiao and S. Zheng, *Adv. Funct. Mater.*, 2023, **33**, 202304063.
